# Supplementary material
Source: PubMed Central journal article supplement (PMC2726420)
Supplement: 0906944106_0906944106SI.pdf [file 0906944106_0906944106SI.pdf]

# Supporting Information

Liem et al. 10.1073/pnas.0906944106

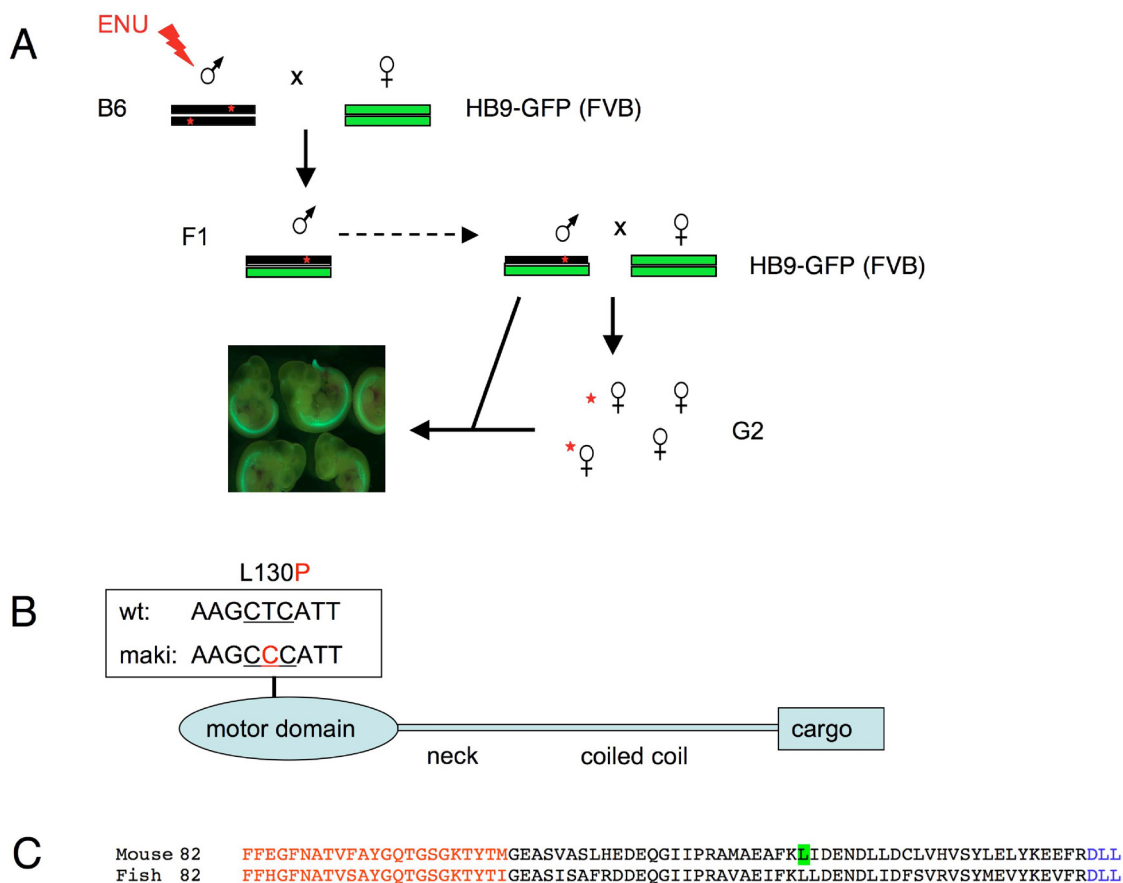

**Fig. S1.** Identification of the *Kif7<sup>maki</sup>* mutation. (A) The crossing scheme of the genetic screen. An *HB9-eGFP* reporter line was generated in the FVB genetic background by using a previously described construct [Wichterle H, Lieberam I, Porter JA, Jessell TM (2002) *Cell* 110:385–397]. Third-generation embryos produced from crosses between G<sub>2</sub> females and the F<sub>1</sub> founder male were potentially homozygous for newly induced mutations and were scored for inappropriate expression of the *HB9-eGFP* reporter or for morphological abnormalities. (B) Position of the *maki* mutation relative to the predicted structure of *Kif7*. (C) Alignment of the region of the zebrafish and mouse *Kif7* sequences in the region of the *maki* mutation, beginning at amino acid 82, the beginning of the P loop. Sequence analysis identified a T-to-C substitution in the *Kif7* ORF of *maki* mutants that would change a conserved leucine to proline (leucine highlighted in green) at amino acid 130, in a conserved region of the *Kif7* motor domain between the P loop (red) and the M1 microtubule binding domain (blue).

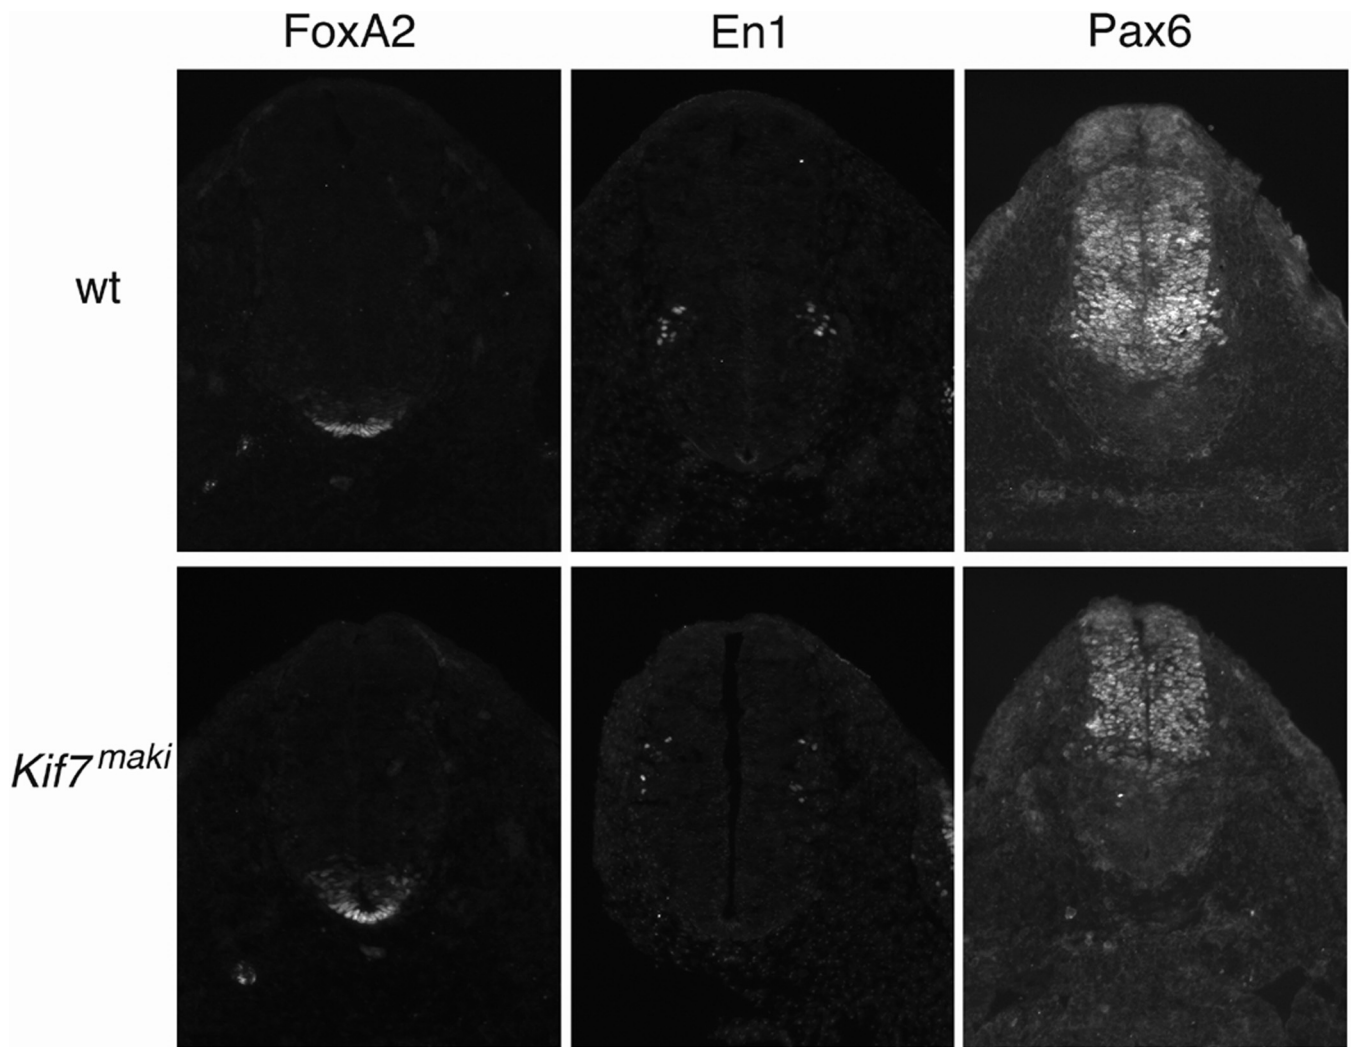

**Fig. S2.** Dorsal-ventral neural patterning in the E10.5 *Kif7<sup>maki</sup>* neural tube. FoxA2, a marker for the floor plate, is expressed in the same, or a slightly expanded domain, in *Kif7<sup>maki</sup>* mutants. En1, which marks the V1 population of cells that is specified by low levels of Shh, is expressed at a more dorsal position in the *Kif7<sup>maki</sup>* neural tube than in wild type. The domain of the progenitor marker Pax6 is shifted dorsally in the *Kif7<sup>maki</sup>* neural tube.

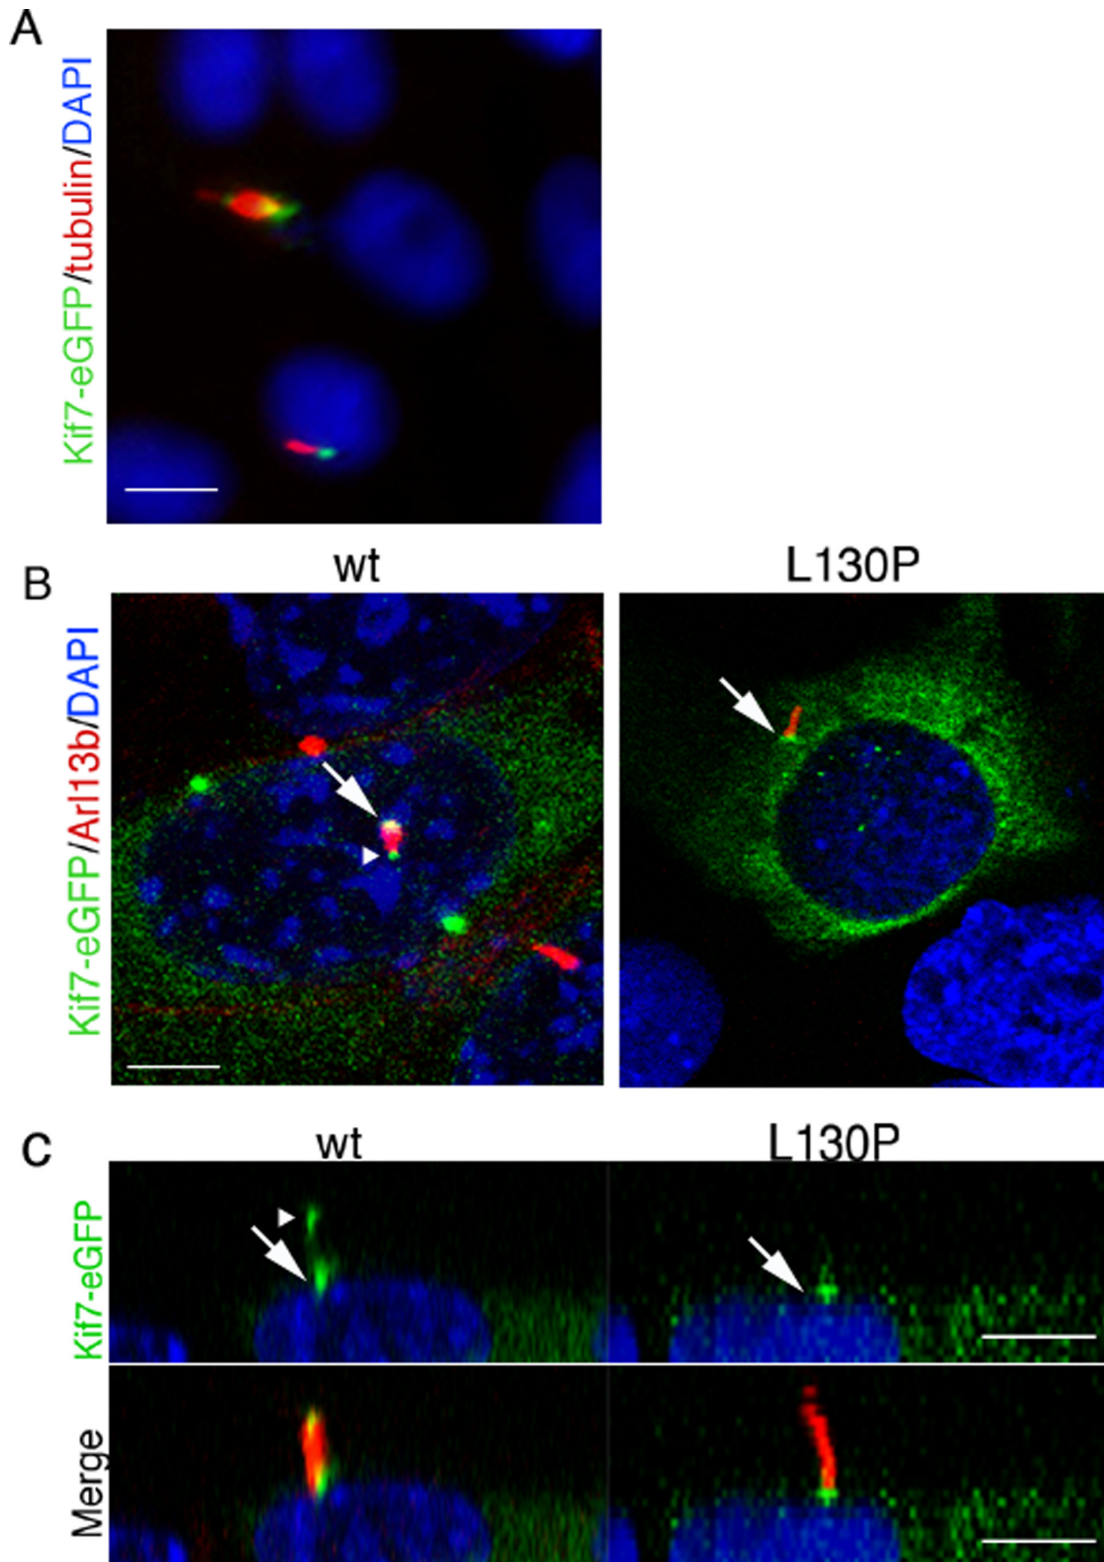

**Fig. S3.** Localization of Kif7-eGFP in MDCK and IMCD3 cells. Confocal images (A and B) and apical-basal projections (C) of MDCK cells (A) and IMCD3 cells (B and C) expressing Kif7-eGFP. Wild-type Kif7-eGFP was enriched at the base of the primary cilia in MDCK cells and at both the base (arrows) and the tip (arrowhead) of cilia in IMCD3 cells ( $n = 40$ ). Kif7<sup>L130P</sup>-eGFP was only associated with the base (arrows) of the IMCD3 cilia ( $n = 35$ ). Cell culture was performed as described previously [Follitt JA, Tuft RA, Fogarty KE, Pazour GJ (2006) *Mol Biol Cell* 17:3781–3792]. Cilia (red) were visualized by using antibodies to acetylated  $\alpha$ -tubulin (A) or Arl13b (B) [Caspary T, Larkins CE, Anderson KV (2007) *Dev Cell* 12:767–778]. (Scale bars: 5  $\mu$ m.)
